# Supplementary material
Source: PubMed Central journal article supplement (PMC5648719)
Supplement: JCM.00659-17_zjm999095641s1.pdf [file JCM.00659-17_zjm999095641s1.pdf]

Supplemental Figure S1. Schematic of long PCR and sequencing for determination of the complete HTLV-1 proviral genome.

As described in the Materials and Methods and Supplemental Table S6, four long DNA fragments in the full HTLV-1 genome were amplified using primers indicated by orange arrows. Using the sequencing primers indicated by blue arrows (also listed in Supplemental Table S7), nucleotide sequences were read from both strands. Sequence tags in the sense orientation are indicated as black lines, and those in antisense orientations are indicated by red lines. The size of the line is set as ~600 bases in this figure. Nucleotide numbering is based on the ATK-1 prototypic sequence (Genbank: J02029).

Supplemental Figure S2. Correlation between the CLEIA cutoff index (COI) and HTLV-1 qPCR results.

CLEIA COIs at the initial screening test of PV+ and PV- blood donors were plotted. PV+: WB indeterminate samples that were provirus positive in HTLV-1 qPCR. PV-: WB indeterminate samples that were provirus negative in HTLV-1 qPCR.

Supplemental Table S1. Interpretations of results of the Problot HTLV-1 WB test kit used in this study.

| Env<br>gp46 | Gag                         |     |     | Interpretation |
|-------------|-----------------------------|-----|-----|----------------|
|             | p19                         | p24 | p53 |                |
| +           | At least a band is +        |     |     | Positive       |
| -           | -                           | -   | -   | Negative       |
| -           | At least a band is +/- or + |     |     | Indeterminate  |
| +/-         | Any patterns                |     |     |                |
| +           | Any bands are - or +/-      |     |     |                |

Supplemental Table S2. HTLV-1 antibody titers, band patterns of WB results, and PVL of WB indeterminate.

| ID     | Age | Gender | CLEIA          |      |      | WB (Problot HTLV-1) |     |     |      | Result            | PVL <sup>*1</sup> |
|--------|-----|--------|----------------|------|------|---------------------|-----|-----|------|-------------------|-------------------|
|        |     |        | (Cutoff index) |      |      | p19                 | p24 | p53 | gp46 |                   |                   |
| K-1001 | 51  | F      | 1.6            | 1.5  | 1.5  | ±                   | -   | -   | -    | Ind <sup>*2</sup> | UD <sup>*3</sup>  |
| K-1002 | 52  | M      | 2.4            | 2.4  | 2.5  | -                   | -   | -   | ±    | Ind               | 0.0143            |
| K-1003 | 51  | M      | 1.8            | 1.6  | 1.6  | +                   | +   | -   | -    | Ind               | 0.0010            |
| K-1004 | 57  | M      | 5.2            | 5.0  | 4.9  | +                   | +   | -   | ±    | Ind               | 0.0058            |
| K-1005 | 41  | M      | 1.8            | 1.7  | 1.7  | -                   | +   | -   | -    | Ind               | UD                |
| K-1006 | 46  | M      | 10.0           | 10.0 | 10.0 | +                   | +   | +   | ±    | Ind               | 0.0341            |
| K-1007 | 33  | M      | 6.3            | 6.6  | 6.4  | +                   | +   | +   | ±    | Ind               | 0.0292            |
| K-1008 | 42  | M      | 1.0            | 1.0  | 1.0  | +                   | +   | +   | -    | Ind               | UD                |
| K-1009 | 38  | M      | 1.1            | 1.1  | 1.1  | +                   | +   | +   | -    | Ind               | UD                |
| K-1010 | 58  | M      | 1.6            | 1.6  | 1.7  | +                   | +   | -   | ±    | Ind               | UD                |
| K-1011 | 34  | F      | 10.0           | 10.0 | 10.0 | +                   | +   | +   | -    | Ind               | 0.0415            |
| K-1012 | 42  | M      | 1.0            | 1.1  | 1.0  | +                   | +   | +   | -    | Ind               | UD                |
| K-1013 | 55  | M      | 5.9            | 6.0  | 6.1  | +                   | +   | +   | ±    | Ind               | 0.0063            |
| K-1014 | 60  | M      | 1.6            | 1.7  | 1.6  | ±                   | -   | -   | -    | Ind               | 0.0011            |
| K-1015 | 47  | M      | 1.5            | 1.6  | 1.6  | +                   | -   | -   | ±    | Ind               | 0.2444            |
| K-1016 | 57  | F      | 2.8            | 2.8  | 2.9  | +                   | ±   | -   | ±    | Ind               | 0.0015            |
| K-1017 | 26  | M      | 1.8            | 1.8  | 1.9  | -                   | +   | -   | -    | Ind               | UD                |
| K-1018 | 58  | F      | 5.7            | 5.3  | 5.2  | ±                   | -   | -   | -    | Ind               | 0.0596            |
| K-1019 | 26  | M      | 1.2            | 1.3  | 1.3  | +                   | +   | ±   | -    | Ind               | 0.0843            |
| K-1020 | 65  | M      | 1.5            | 1.6  | 1.5  | -                   | +   | -   | -    | Ind               | UD                |
| K-1021 | 52  | F      | 1.7            | 1.7  | 1.6  | +                   | -   | -   | -    | Ind               | UD                |
| K-1022 | 20  | M      | 1.1            | 1.1  | 1.1  | ±                   | -   | -   | -    | Ind               | 0.0627            |
| K-1023 | 32  | M      | 1.0            | 1.0  | 1.0  | +                   | +   | +   | -    | Ind               | UD                |

|        |    |   |     |     |     |   |   |   |   |     |        |
|--------|----|---|-----|-----|-----|---|---|---|---|-----|--------|
| K-1024 | 65 | M | 1.2 | 1.1 | 1.1 | + | + | + | - | Ind | UD     |
| K-1025 | 42 | M | 1.2 | 1.3 | 1.3 | + | + | + | - | Ind | UD     |
| K-1026 | 52 | F | 2.0 | 1.9 | 1.9 | - | ± | - | - | Ind | UD     |
| K-1027 | 57 | M | 1.0 | 1.0 | 1.1 | + | - | - | - | Ind | UD     |
| K-1028 | 51 | M | 1.2 | 1.2 | 1.1 | + | - | - | - | Ind | UD     |
| K-1029 | 48 | F | 2.7 | 2.6 | 2.7 | + | + | + | - | Ind | 0.0094 |
| K-1030 | 39 | F | 1.1 | 1.0 | 1.0 | + | + | + | - | Ind | UD     |
| K-1031 | 38 | F | 3.3 | 3.4 | 3.3 | + | - | - | - | Ind | 0.0005 |
| K-1032 | 30 | M | 1.0 | 1.0 | 1.0 | + | + | + | - | Ind | UD     |
| K-1033 | 45 | F | 8.0 | 8.1 | 8.3 | + | + | + | - | Ind | 0.0052 |
| K-1034 | 51 | M | 1.6 | 1.6 | 1.5 | + | + | - | - | Ind | 0.0023 |
| K-1035 | 34 | M | 1.2 | 1.2 | 1.2 | + | + | + | - | Ind | UD     |
| K-1036 | 65 | F | 2.6 | 2.5 | 2.4 | - | ± | - | - | Ind | UD     |
| K-1037 | 58 | M | 2.9 | 2.9 | 2.9 | + | + | + | - | Ind | UD     |
| K-1038 | 25 | M | 2.1 | 2.1 | 2.1 | + | + | + | - | Ind | UD     |
| K-1039 | 59 | M | 4.7 | 5.2 | 5.0 | + | + | - | - | Ind | 0.0009 |
| T-1001 | 32 | F | 1.0 | 0.9 | 1.0 | + | + | + | - | Ind | UD     |
| T-1002 | 21 | F | 1.0 | 1.0 | 1.0 | + | + | + | - | Ind | UD     |
| T-1003 | 50 | M | 1.1 | 1.1 | 1.0 | + | + | + | - | Ind | UD     |
| T-1004 | 58 | M | 1.6 | 1.5 | 1.4 | + | + | + | - | Ind | UD     |
| T-1005 | 43 | M | 1.0 | 1.0 | 1.0 | + | + | + | - | Ind | UD     |
| T-1006 | 39 | F | 1.6 | 1.7 | 1.6 | + | + | + | - | Ind | UD     |
| T-1007 | 53 | M | 8.3 | 8.5 | 8.4 | + | + | + | ± | Ind | 0.0006 |
| T-1008 | 58 | M | 1.5 | 1.5 | 1.5 | + | + | + | - | Ind | UD     |
| T-1009 | 58 | M | 1.4 | 1.4 | 1.4 | + | ± | ± | - | Ind | UD     |
| T-1010 | 39 | F | 4.2 | 3.9 | 3.9 | + | - | - | - | Ind | UD     |
| T-1011 | 21 | M | 1.1 | 1.1 | 1.1 | + | ± | - | - | Ind | UD     |
| T-1012 | 20 | M | 2.5 | 2.3 | 2.4 | + | + | + | ± | Ind | 0.0192 |
| T-1013 | 39 | F | 1.6 | 2.4 | 2.3 | + | + | + | - | Ind | UD     |
| T-1014 | 51 | M | 1.8 | 1.1 | 1.1 | + | + | + | - | Ind | UD     |
| T-1015 | 40 | M | 1.9 | 1.4 | 1.1 | + | + | + | - | Ind | UD     |
| T-1016 | 58 | M | 1.2 | 1.4 | 1.4 | + | ± | - | - | Ind | UD     |
| T-1017 | 24 | F | 2.3 | 2.3 | 2.2 | + | + | + | - | Ind | UD     |
| T-1018 | 56 | M | 1.0 | 1.1 | 1.1 | + | + | + | - | Ind | UD     |
| T-1019 | 29 | M | 1.1 | 1.1 | 1.0 | + | + | + | - | Ind | UD     |
| T-1020 | 58 | M | 1.3 | 1.2 | 1.2 | + | ± | ± | - | Ind | UD     |
| T-1021 | 39 | F | 2.3 | 2.2 | 2.2 | + | + | + | - | Ind | UD     |
| T-1022 | 37 | M | 1.4 | 1.4 | 1.4 | + | + | + | - | Ind | UD     |
| T-1023 | 48 | F | 1.6 | 1.5 | 1.5 | + | + | + | - | Ind | UD     |
| T-1024 | 32 | F | 1.4 | 1.5 | 1.5 | + | + | + | - | Ind | UD     |
| T-1025 | 57 | M | 7.1 | 7.3 | 7.3 | + | - | + | - | Ind | 0.0025 |
| T-1026 | 58 | M | 1.2 | 1.1 | 1.2 | + | ± | ± | - | Ind | UD     |
| T-1027 | 16 | F | 1.0 | 1.1 | 1.1 | - | ± | - | - | Ind | UD     |

|        |    |   |     |     |     |   |   |   |   |                   |        |
|--------|----|---|-----|-----|-----|---|---|---|---|-------------------|--------|
| T-1028 | 45 | M | 1.5 | 1.6 | 1.6 | + | + | + | - | Ind               | UD     |
| T-1029 | 50 | M | 2.6 | 2.3 | 2.4 | + | + | + | - | Ind               | UD     |
| T-1030 | 50 | M | 1.9 | 1.9 | 1.9 | + | + | ± | - | Ind               | UD     |
| T-1031 | 30 | F | 1.2 | 1.2 | 1.2 | + | + | + | - | Ind               | UD     |
| T-1032 | 25 | M | 1.7 | 1.6 | 1.7 | + | + | + | - | Ind               | UD     |
| T-1033 | 39 | M | 3.9 | 4.0 | 4.1 | ± | - | - | - | Ind               | UD     |
| T-1034 | 58 | M | 1.1 | 1.2 | 1.2 | + | + | + | - | Ind               | UD     |
| T-1035 | 21 | F | 1.7 | 1.8 | 1.8 | + | + | + | - | Ind               | UD     |
| T-1036 | 42 | M | 1.0 | 1.0 | 1.0 | ? | ? | ? | ? | Ind <sup>*4</sup> | UD     |
| T-1037 | 38 | M | 1.0 | 1.1 | 1.0 | + | + | + | - | Ind               | UD     |
| T-1038 | 28 | M | 2.1 | 2.1 | 2.2 | + | - | - | - | Ind               | UD     |
| T-1039 | 21 | M | 1.3 | 1.1 | 1.1 | + | + | + | - | Ind               | UD     |
| T-1040 | 39 | F | 2.4 | 2.2 | 2.3 | + | - | - | - | Ind               | UD     |
| T-1041 | 27 | F | 1.4 | 1.4 | 1.2 | + | - | - | - | Ind               | UD     |
| T-1042 | 28 | F | 1.1 | 1.1 | 1.1 | + | + | + | - | Ind               | UD     |
| T-1043 | 58 | M | 1.1 | 1.2 | 1.2 | + | - | - | - | Ind               | UD     |
| T-1044 | 37 | M | 1.4 | 1.3 | 1.3 | + | + | + | - | Ind               | UD     |
| T-1045 | 52 | M | 1.1 | 1.0 | 1.0 | + | + | + | - | Ind               | UD     |
| T-1046 | 38 | M | 1.6 | 1.6 | 1.6 | + | + | + | - | Ind               | UD     |
| T-1047 | 54 | F | 1.0 | 1.0 | 1.0 | + | - | - | - | Ind               | UD     |
| T-1048 | 59 | M | 6.5 | 6.1 | 6.1 | + | + | + | - | Ind               | 0.0131 |
| T-1049 | 43 | M | 1.2 | 1.1 | 1.1 | + | + | + | - | Ind               | UD     |
| T-1050 | 37 | M | 1.3 | 1.1 | 1.1 | + | + | + | - | Ind               | UD     |
| T-1051 | 58 | M | 1.2 | 1.1 | 1.2 | + | + | + | - | Ind               | UD     |
| T-1052 | 55 | F | 6.8 | 6.3 | 6.3 | + | ± | - | - | Ind               | UD     |
| T-1053 | 32 | M | 1.1 | 1.1 | 1.1 | ? | ? | ? | ? | Ind               | UD     |
| T-1054 | 21 | F | 1.6 | 1.7 | 1.7 | + | + | + | - | Ind               | UD     |
| T-1055 | 32 | M | 1.1 | 1.1 | 1.1 | + | - | - | - | Ind               | UD     |
| T-1056 | 18 | F | 4.2 | 4.0 | 4.0 | ± | + | + | ± | Ind               | 0.0324 |
| T-1057 | 36 | M | 1.3 | 1.3 | 1.4 | + | + | + | - | Ind               | UD     |
| T-1058 | 19 | F | 2.0 | 2.0 | 2.0 | + | + | + | - | Ind               | UD     |
| T-1059 | 30 | M | 1.2 | 1.1 | 1.2 | ? | ? | ? | ? | Ind               | UD     |
| T-1060 | 45 | M | 1.1 | 1.1 | 1.0 | + | + | + | - | Ind               | UD     |
| T-1061 | 39 | M | 1.0 | 1.0 | 1.0 | ? | ? | ? | ? | Ind               | UD     |

\*1: PVL indicates proviral loads (copies/100 cells).

\*2: Ind indicates indeterminate.

\*3: UD indicates undetermined by qPCR.

\*4: ? of all WB bands indicates indeterminate because of excessive background signals.

Supplemental Table S3. Concentration of CFSE-stained TL-Om1 cells analyzed by flow cytometry in the low copy HTLV-1 panel.

| Sample name | Total cells analyzed | CFSE (+) cells | TL-Om1 concentration |
|-------------|----------------------|----------------|----------------------|
| 0.05%       | 372,576              | 195            | 0.052%               |
| 0.02%       | 608,950              | 137            | 0.023%               |
| 0.005%      | 1,777,902            | 97             | 0.0055%              |
| 0.002%      | 1,768,789            | 37             | 0.0021%              |

Supplemental Table S4. Concentrations of CFSE-stained TL-Om1 cells diluted with PBMCs which were analyzed by flow cytometry in the extremely low copy HTLV-1 panel.

| Sample Name | Total cells analyzed | CFSE (+) cells | TL-Om1 concentration |
|-------------|----------------------|----------------|----------------------|
| 0.02%       | 1,977,510            | 312            | 0.0158%              |
| 0.005%      | 1,964,932            | 86             | 0.0044%              |
| 0.002%      | 6,897,479            | 116            | 0.0017%              |
| 0.0005%     | 7,845,021            | 46             | 0.0006%              |
| 0.0002%     | 7,852,649            | 12             | 0.00015%             |

Table S5. List of primer and probe sequences, IC genes, and extraction methods of the laboratories\*1.

| Method | Sequence of HTLV-1 primer and probe<br>(5' to 3' orientation)                                                | IC gene | DNA extraction method                 | Reference |
|--------|--------------------------------------------------------------------------------------------------------------|---------|---------------------------------------|-----------|
| 1      | Forward: CAAACCGTCAAGCACAGCTT<br>Reverse: TCTCCAAACACGTAGACTGGGT<br>Probe: TTCCCAGGGTTTGGACAGAGTCTTCT        | ACTB    | Silica membrane based column          | 1         |
| 2      | Forward: GAAGACTGTTTGCCACCACC<br>Reverse: TGAGGGTTGAGTGGAACGGA<br>Probe: CACCCGTCACGCTAACAGCCTGGCAA          | RAG1    | Silica membrane based column          | 2         |
| 3      | Forward: TGGACAGAGTCTTCTTTTCGGATA<br>Reverse: CACCAGTCGCCTTGACACAGT<br>Probe: CCAGTCTACGTGTTTGG              | CD81    | Silica membrane based column          | 3         |
| 4*     | Forward: CGGATACCCAGTCTACGTGTT<br>Reverse: CAGTAGGGCGTGACGATGTA<br>Probe: CTGTGTACAAGGCGACTGGTGCC            | RPPH1   | Silica membrane based column          | 4         |
| 5      | Forward:<br>Reverse: Same as method 4<br>Probe:                                                              | ALB     | Silica membrane based column          | 5         |
| 6      | Forward: CCCACTTCCCAGGGTTTGGGA<br>Reverse: GGCCAGTAGGGCGTGA<br>Probe: CCAGTCTACGTGTTTGGAGACTGTGTACA          | HBB     | Silica membrane based column          | 6         |
| 7      | Forward: ACAAAGTTAACCATGCTTATTATCAGC<br>Reverse: ACACGTAGACTGGGTATCCGAA<br>Probe: TTCCCAGGGTTTGGACAGAGTCTTCT | ACTB    | SDS-PK digestion<br>Phenol-Chloroform | 7         |

\*1: This table is also listed as Supplemental data in reference S8.

\*2: Method number 4 was used by two laboratories.

Supplemental Table S6. Nested genomic long-PCR primers for HTLV-1 full length genome sequence

|               |                     | Name  | Sequence                | Name  | Sequence                     | Size<br>(bps) | Nucleotide region<br>equivalent to ATK-1 |
|---------------|---------------------|-------|-------------------------|-------|------------------------------|---------------|------------------------------------------|
| Fragment<br>1 | 1 <sup>st</sup> PCR | 209F  | CATTTCTCCCATGTTTGCAAG   | 071R  | CGGTGACTGTGGTGGAGTAAGAT      | 3556          | 241-3796                                 |
|               | 2 <sup>nd</sup> PCR | 008F  | CCCTGCTTGCTCAACTCTACGT  | 066R  | GGGCATGTAGCCAGACAAGTG        | 3016          | 585-3600                                 |
| Fragment<br>2 | 1 <sup>st</sup> PCR | 053F  | GGAGGCAGGCCATATCGAA     | 122R  | AATGGAGATTAATATTGAGGTGTGAAAC | 3000          | 2663-5662                                |
|               | 2 <sup>nd</sup> PCR | 056F  | TAGTCCCACCCTGTTTCGAAATG | 109R  | TGGTGTTGGTGGTCTTTTCTTT       | 2209          | 2996-5203                                |
| Fragment<br>3 | 1 <sup>st</sup> PCR | 092F  | CTCCAATATCCTGCGCTCTTG   | 173R  | CCGAACATAGTCCCCAGAGA         | 3033          | 4400-7432                                |
|               | 2 <sup>nd</sup> PCR | 101F* | TGCCTATATTCCCAAGACTTCCT | 153R  | AGGGATGACTCAGGGTTATAAGAGA    | 1975          | 4691-6665                                |
| Fragment<br>4 | 1 <sup>st</sup> PCR | 122F  | CCTAGGGTGCCAATCATGGA    | 008R  | GGCAGTCAGTCGTGAATGAAAG       | 3418          | 5544-8961                                |
|               | 2 <sup>nd</sup> PCR | 137F  | CCCCACCTGACGTTACCATT    | 005R* | TCAGTCGTGAATGAAAGGAAAG       | 2962          | 5995-8956                                |

\* these primers were reported previously in reference S9

ATK-1 (J02029) is the prototype sequence of HTLV-1

Supplemental Table S7. Sequence primer sets corresponding to nested genomic long-PCR fragments

| Primers for fragment 1  |                          | Primers for fragment 2   |                           | Primers for fragment 3 |                              | Primers for fragment 4     |                            |
|-------------------------|--------------------------|--------------------------|---------------------------|------------------------|------------------------------|----------------------------|----------------------------|
| <b>15R</b>              | AGGCTGGCTAGGAGGGAGTAGTT  | <b>056F</b>              | TAGTCCCACCCTGTTCGAAATG    | <b>107F</b>            | AGCCGATCCCAGAGACACATT        | <b>153F</b>                | TTGTCGCGCTACTCCTTCTTG      |
| <b>18F<sup>*1</sup></b> | CCAAGTCTTCCAGTCATGCA     | <b>066F</b>              | TGCCGAGTAGACTAGTCCAAAC    | <b>107R</b>            | GCCTCTGTGGTCTTTCC            | <b>153R</b>                | AGGGATGACTCAGGGTTTATAAGAGA |
| <b>18R<sup>*</sup></b>  | CGCTTGGGAGACTTCTTGCT     | <b>071F</b>              | CTGCCAAACCATACATCATAACATC | <b>109F</b>            | ATCCCGGTAAGCGCTAGTTCT        | <b>158F</b>                | GCACACAATTATTGCAACCACAT    |
| <b>25F</b>              | CCGAAACTCGAGGTATTACAGGTT | <b>071R</b>              | CGGTGACTGTGGTGGAGTAAGAT   | <b>109R</b>            | TGGTGTGGTGGTCTTTTCTTT        | <b>158R</b>                | TGGAGTCTTGGAGGCTGAA        |
| <b>25R</b>              | GTTGCTGGTATTCTGCTTAATC   | <b>084F<sup>*1</sup></b> | CCTGCCCGCTTACTATCG        | <b>117F</b>            | CTACAGCCCCCTGCCCTAA          | <b>167F</b>                | TCCTCTTGCTTTAACTCTTCT      |
| <b>34F</b>              | GGAGATATGTTGCGGGCTTGT    | <b>084R<sup>*1</sup></b> | GGCATCTGTGAGAGCGTTGA      | <b>122F</b>            | CCTAGGGTGCCAATCATGGA         | <b>173F</b>                | TCCCAGGGTTTGGACAGAGT       |
| <b>34R</b>              | CGGAAGCACGGCTGATT        | <b>092F</b>              | CTCCAATATCTGCGCTCTTG      | <b>122R</b>            | AATGGAGATTAATATTGAGGTGTGAAAC | <b>173R</b>                | CCGAACATAGTCCCCCAGAGA      |
| <b>41F<sup>*1</sup></b> | ACAGTCTTCCGATAGCCTTGT    | <b>092R</b>              | TGCCAGATGTGGTTAGGGAGTAG   | <b>131mF</b>           | GAGCCCTCTATACCATGGAAAT       | <b>180F<sup>*1</sup></b>   | GGCCTTCTCACCAATGTTC        |
| <b>41R<sup>*</sup></b>  | GGGAGGTGAGCTTAAAGTGATCTT | <b>101F<sup>*1</sup></b> | TGCCTATATTTCCAAGACTTCT    | <b>137F</b>            | CCCCACCTGACGTTACCATT         | <b>187F</b>                | CAAGGCCTACCACCCCTCAT       |
| <b>48F</b>              | CCGCCTGTAATCTTGCCAATA    | <b>101R<sup>*1</sup></b> | TTCTACAAGTCCGGAGCTGGTT    | <b>137R</b>            | GGGAACAGGTGACAAGGAAAAG       | <b>187R</b>                | GGGATGTTGGTGTATTCTTCAAATAG |
| <b>48R</b>              | GGAGGCGTTCTGGTTAAAGG     |                          |                           |                        |                              | <b>202R</b>                | TTAGTCTGGCCCTGACCT         |
| <b>53F</b>              | GGAGGCAGGCCATATCGAA      |                          |                           |                        |                              | <b>209F</b>                | CATTTCTCCCCATGTTTGTCAAG    |
| <b>56R</b>              | GCCAGGAGAATGTCATCCATGT   |                          |                           |                        |                              | <b>209mR</b>               | TCCACGCTTTTATAGACTCTG      |
| <b>66R</b>              | GGGCATGTAGCCAGACAAGTG    |                          |                           |                        |                              | <b>pX2-AS<sup>*2</sup></b> | CAGTAGGGCGTGACGATGTA       |
| <b>568F</b>             | CTCAACTCTACGCTTTGTTTCG   |                          |                           |                        |                              | <b>627R</b>                | GTGGAACTTTCGATCTGTARCG     |

\* These primers were reported previously in reference S8. \*\* the primer was reported previously in reference S4.



## SUPPLEMENTAL REFERENCES

- S1. Takenouchi N, Yamano Y, Usuku K, Osame M, Izumo S. 2003. Usefulness of proviral load measurement for monitoring of disease activity in individual patients with human T-lymphotropic virus type I-associated myelopathy/tropical spastic paraparesis. *J Neurovirol* 9:29-35.
- S2. Miyazato P, Yasunaga J, Taniguchi Y, Koyanagi Y, Mitsuya H, Matsuoka M. 2006. De novo human T-cell leukemia virus type 1 infection of human lymphocytes in NOD-SCID, common gamma-chain knockout mice. *J Virol* 80:10683-91.
- S3. Sobata R, Matsumoto C, Uchida S, Suzuki Y, Satake M, Tadokoro K. 2015. Estimation of the infectious viral load required for transfusion-transmitted human T-lymphotropic virus type 1 infection (TT-HTLV-1) and of the effectiveness of leukocyte reduction in preventing TT-HTLV-1. *Vox Sang* 109:122-8.
- S4. Watanabe M, Ohsugi T, Shoda M, Ishida T, Aizawa S, Maruyama-Nagai M, Utsunomiya A, Koga S, Yamada Y, Kamihira S, Okayama A, Kikuchi H, Uozumi K, Yamaguchi K, Higashihara M, Umezawa K, Watanabe T, Horie R. 2005. Dual targeting of transformed and untransformed HTLV-1-infected T cells by DHMEQ, a potent and selective inhibitor of NF-kappaB, as a strategy for chemoprevention and therapy of adult T-cell leukemia. *Blood* 106:2462-71.
- S5. Tanaka G, Okayama A, Watanabe T, Aizawa S, Stuver S, Mueller N, Hsieh CC, Tsubouchi H. 2005. The clonal expansion of human T lymphotropic virus type 1-infected T cells: a comparison between seroconverters and long-term carriers. *J Infect Dis* 191:1140-7.
- S6. Kamihira S, Dateki N, Sugahara K, Hayashi T, Harasawa H, Minami S, Hirakata Y, Yamada Y. 2003. Significance of HTLV-1 proviral load quantification by real-time PCR as a surrogate marker for HTLV-1-infected cell count. *Clin Lab Haematol* 25:111-7.
- S7. Nagai M, Yamano Y, Brennan MB, Mora CA, Jacobson S. 2001. Increased HTLV-I proviral load and preferential expansion of HTLV-I Tax-specific CD8+ T cells in cerebrospinal fluid from patients with HAM/TSP. *Ann Neurol* 50:807-12.
- S8. Kuramitsu M, Okuma K, Yamochi T, Sato T, Sasaki D, Hasegawa H, Umeki K, Kubota R, Sobata R, Matsumoto C, Kaneko N, Naruse I, Yamagishi M, Nakashima M, Momose H, Araki K, Mizukami T, Mizusawa S, Okada Y, Ochiai M, Utsunomiya A, Koh KR, Ogata M, Nosaka K, Uchimaruru K, Iwanaga M, Sagara Y, Yamano Y, Satake M, Okayama A, Mochizuki M, Izumo S, Saito S, Itabashi K, Kamihira S, Yamaguchi K, Watanabe T, Hamaguchi I. 2015. Standardization of Quantitative PCR for Human T-Cell Leukemia Virus Type 1 in Japan: a Collaborative Study. *J*

Clin Microbiol 53:3485-91.

- S9. Kuramitsu M, Okuma K, Yamagishi M, Yamochi T, Firouzi S, Momose H, Mizukami T, Takizawa K, Araki K, Sugamura K, Yamaguchi K, Watanabe T, Hamaguchi I. 2015. Identification of TL-Om1, an adult T-cell leukemia (ATL) cell line, as reference material for quantitative PCR for human T-lymphotropic virus 1. J Clin Microbiol 53:587-96.
